# Supplementary material
Source: HighWire-hosted journal article supplement (doi:10.1101/rna.057778.116)
Supplement: Supplemental_Fig_legends.docx [file Supplemental_Fig_legends.docx]

**Supplemental information**

**Supplemental figures legends**

**Supplemental Figure S1. Protein and RNA compositions of the spliceosomal Bact complex from *S. cerevisiae.*** The protein composition of the yeast spliceosomal Bact complex was determined by mass spectrometry and the proteins (yeast nomenclature) and snRNAs are grouped according to their snRNP association, function or presence in a stable heteromeric subcomplex (Fabrizio *et al*, 2009). Asterisks mark the proteins and snRNAs that were located in this study (C or N-terminus for the proteins and 5' cap for snRNAs).

**Supplemental Figure S2. Gradient profiles and ELISA of antibody-labeled spliceosomal Bact complexes containing the respective TAP-tagged proteins.** In each panel, the red and the blue curve represent the radioactivity profile of the gradient with or without antibody addition, respectively. The ELISA result, showing the antibody content of the gradient fractions, is added in green. The identity of the protein that was present in spliceosomal Bact complexes and the respective terminus to which the TAP tag was fused is indicated above each graph.

**Supplemental Figure S3. Typical negative-stain electron micrographs of yeast spliceosomal Bact complex dimers.** Negative-stain EM images of Bact complex dimers were taken at 115,000-fold magnification to give an overview of the sample. For each image, a scale bar representing 30 nm is shown,
