# Supplementary material
Source: HighWire-hosted journal article supplement (doi:10.1101/rna.057778.116)
Supplement: Supplemental_Table_S1.docx [file Supplemental_Table_S1.docx]

**Supplemental Table S1. TAP tagged yeast strains and pre-mRNA substrates used for assembling the spliceosomal Bact complex**

| Labelled protein in Bact | Tagged terminus | Parental strain | Pre-mRNA substrate |
| --- | --- | --- | --- |
| Brr2 | C-terminus | TR2 | M3-Actin Δ6 |
| N-terminus | YPH499 | M3-Actin Δ6 |
| Prp8 | C-terminus | TR2 | M3-Actin Δ6 |
| N-terminus | YPH499 | M3-Actin Δ6 |
| Snu114 | C-terminus | TR2 | M3-Actin Δ6 |
| Cus1 | C-terminus | prp2-1 | M3-Actin wt |
| Hsh155 | C-terminus | prp2-1 | M3-Actin wt |
| Rse1 | C-terminus | Euroscarf | M3-Actin Δ6 |
| Prp9 | C-terminus | prp2-1 | M3-Actin wt |
| Prp11 | C-terminus | prp2-1 | M3-Actin wt |
| Lea1 | C-terminus | Euroscarf | M3-Actin Δ6 |
| Pml1 | C-terminus | prp2-1 | M3-Actin wt |
| Prp19 | C-terminus | BJ2168 | M3-Actin Δ6 |
| Syf1 | C-terminus | prp2-1 | M3-Actin wt |
| Cef1 | C-terminus | Euroscarf | M3-Actin Δ6 |
| Isy1 | C-terminus | prp2-1 | M3-Actin wt |
| Ntc20 | C-terminus | prp2-1 | M3-Actin wt |
| Cwc2 | C-terminus | Euroscarf | M3-Actin Δ6 |
| Cwc21 | C-terminus | prp2-1 | M3-Actin wt |
| Cwc24 | C-terminus | BJ2168 | M3-Actin Δ6 |
| Prp2 | C-terminus | Euroscarf | M3-Actin Δ6 |
| Spp2 | N-terminus | BJ2168 | M3-Actin Δ6 |
